1 **Title**

2 **A Protein Kinase A-Regulated Network Encodes Short- and Long-Lived Cellular**  
3 **Memory**

4  
5  
6

7 **Author names and affiliations**

8 Yanfei Jiang<sup>1, §</sup>, Zohreh AkhavanAghdam<sup>1, §</sup>, Yutian Li<sup>1, §</sup>, Brian M. Zid<sup>2</sup>, and Nan Hao<sup>1,3\*</sup>

9

10 <sup>1</sup>Section of Molecular Biology, Division of Biological Sciences, University of California San Diego,  
11 9500 Gilman Drive, La Jolla, CA 92093, USA

12 <sup>2</sup>Department of Chemistry and Biochemistry, University of California San Diego, 9500 Gilman Drive,  
13 La Jolla, CA 92093, USA

14 <sup>3</sup>Lead Contact

15

16 §These authors contributed equally to this work.

17

18 **Contact**

19 \*Correspondence: [nhao@ucsd.edu](mailto:nhao@ucsd.edu)

20

21

## 22 **Abstract**

23           Cells can store memories of prior experiences to modulate their responses to subsequent  
24 stresses, as seen for the protein kinase A (PKA)-mediated general stress response in yeast, which is  
25 required for resistance against future stressful conditions. Using microfluidics and time-lapse  
26 microscopy, we quantitatively analyzed how cellular memory of stress adaptation is encoded in single  
27 yeast cells. We found that cellular memory is biphasic. Short-lived memory was mediated by trehalose  
28 synthase and trehalose metabolism. Long-lived memory was mediated by PKA-regulated stress-  
29 responsive transcription factors and cytoplasmic messenger ribonucleoprotein (mRNP) granules.  
30 Strikingly, short- and long-lived memory could be selectively induced by different priming input  
31 dynamics. Computational modeling revealed how the PKA-mediated regulatory network could  
32 encode previous stimuli into memories with distinct dynamics. This biphasic memory-encoding  
33 scheme, analogous to innate and adaptive immune responses in mammals, might represent a general  
34 strategy to prepare for future challenges in rapidly changing environments.

35

36

37 **Key words:** systems biology, cellular memory, PKA, metabolism, mRNP granules, microfluidics,  
38 computational modeling, regulatory network, signaling dynamics

39

## 40 **Introduction**

41 Cells survive rapidly changing environments through adaptation mediated by sophisticated  
42 signaling and gene regulatory networks. How these networks operate dynamically to process complex  
43 extracellular signals and elicit appropriate responses remains a challenging question (Behar and  
44 Hoffmann, 2010; Levine et al., 2013; Purvis and Lahav, 2013). Recent advances in microfluidics and  
45 single-cell imaging technologies allow us to track the responses of individual living cells in a precisely  
46 controlled changing environment, providing a unique opportunity to elucidate the underlying  
47 principles for dynamic signal processing in cells (Bennett and Hasty, 2009). In this study, we exploited  
48 these cutting-edge technologies to systematically probe the regulatory network that enables cells to  
49 encode memory of prior environmental cues in order to modulate their adaptive responses to future  
50 challenges.

51 History-dependent cellular behaviors have been found in many organisms (Durrant and Dong,  
52 2004; Hilker et al., 2016; Lou and Yousef, 1997; Matsumoto et al., 2007; Netea et al., 2015; Schenk et  
53 al., 2000; Scholz et al., 2005). For instance, it has been long established in the field of plant physiology  
54 that plant cells, once primed by mild stresses or chemical compounds, could obtain enhanced  
55 resistance to various future diseases and abiotic stresses (Prime et al., 2006; Savvides et al., 2016). In  
56 another oft-cited example, pre-treatment of human macrophages with interferon- $\gamma$  significantly  
57 boosts subsequent lipopolysaccharide (LPS) responses against various pathogens and in tumor cell  
58 killing (Gifford and Lohmann-Matthes, 1987; Hayes et al., 1995). In this study, we referred these  
59 history-dependent responses in single cells as “cellular memory”, which is of course fundamentally  
60 different from the neuronal memory in animals.

61 In the yeast *Saccharomyces cerevisiae*, a given stress can activate its specific response pathway as  
62 well as a common signaling pathway shared by a wide range of different stresses, called the general  
63 stress response (GSR) pathway (Gasch et al., 2000). This pathway is primarily mediated by protein

64 kinase A (PKA). In response to stresses, PKA is rapidly inhibited, leading to activation of downstream  
65 transcription factors (TFs), such as Msn2 and Msn4, and the induction of hundreds of stress  
66 responsive genes (Gorner et al., 1998; Hao and O'Shea, 2012; Jiang et al., 2017; Martinez-Pastor et  
67 al., 1996). Previous studies have demonstrated that GSR is not required for survival against immediate  
68 stress threats, but instead, is required for resistance against future stressful conditions (Berry and  
69 Gasch, 2008; Berry et al., 2011; Guan et al., 2012). However, the mechanisms that mediate memory  
70 encoding of environmental changes remain unclear.

71 In this study, we used GSR as a model to quantitatively analyze how PKA-dependent  
72 regulatory processes operate dynamically to encode the memory of environmental changes. We  
73 combined microfluidics with time-lapse microscopy to precisely control the dynamics of priming  
74 inputs and to quantify the memory effect on stress adaptation in single cells. We found that cellular  
75 memory shows two phases, a fast-decaying phase mediated by trehalose metabolism and a long-lasting  
76 phase mediated by stress-activated TFs and messenger ribonucleoprotein (mRNP) granules.  
77 Moreover, the memory dynamics can be modulated by priming inputs. Whereas a high amplitude  
78 transient input specifically induces the fast-decaying phase of memory, a prolonged input is needed  
79 to elicit the long-lasting memory effect. We further developed a computational model based on the  
80 molecular processes identified experimentally. Our model quantitatively revealed the regulatory  
81 scheme that encodes the information of previous environmental inputs into distinct memory  
82 dynamics, implying a general strategy to optimize resource allocation and prepare for future challenges  
83 under rapidly changing environments.

84

## 85 **Results**

### 86 **PKA encodes biphasic cellular memory**

87 Probing the effect of cellular memory has long been challenging, in part due to the difficulty  
88 in generating well-controlled sequential environmental changes in cell cultures. Recent advances in  
89 microfluidic technologies allow the precise control of extracellular conditions and tracking of the  
90 responses of single cells over extended periods (Hansen et al., 2015; Li et al., 2017a), providing a  
91 powerful tool for analyzing the memory behaviors in stress responses. In this study, we modified the  
92 channel design of an existing microfluidic device (Hao and O'Shea, 2012) to include separate control  
93 of three media inlets, one for the priming input, one for the normal growth medium, and one for the  
94 stress treatment (Fig. 1A). To increase the experimental throughput, we further aligned four individual  
95 channels into a single device to enable simultaneous running of multiple experiments, each with its  
96 own cell population and stimulus condition. Using this device, we first exposed the cells to a pulse of  
97 priming input followed by a “break time” with the normal growth medium. We then treated these  
98 primed cells with a sustained environmental stress and evaluated their adaptation responses. The  
99 device was mounted on a time-lapse microscope to track the responses of a large number of single  
100 cells throughout the entire experiment.

101 For the priming input, we used a chemical genetics strategy in which we introduced analog-  
102 sensitive mutations into the PKA isoforms so that they remain fully functional but can be specifically  
103 inhibited by the small molecular inhibitor, 1-NM-PP1 (Bishop et al., 2000). We have previously  
104 employed this strategy to control PKA activity, mimicking an upstream signaling event that  
105 specifically activates GSR, but not other stress specific pathways (AkhavanAghdam et al., 2016;  
106 Hansen and O'Shea, 2013; Hao et al., 2013; Hao and O'Shea, 2012) (Fig. 1B). Moreover, combined  
107 with time-lapse microscopy and microfluidics, it enables us to generate precisely controlled temporal

108 patterns of PKA inhibition as priming inputs and evaluate their effects on cells' adaptation to the  
109 subsequent environmental stress.

110 For the subsequent stress treatment, we chose hyperosmotic stress (0.75M KCl) because the  
111 stress adaptation process in individual cells can be reliably quantified using a specific reporter, the  
112 stress-activated protein kinase Hog1, which we tagged with YFP. In response to osmotic stress, Hog1  
113 rapidly translocates to the nucleus to induce an increase in intracellular osmolyte; once the osmolyte  
114 balance is restored and the cell recovers from the stress, Hog1 exits the nucleus (Brewster and Gustin,  
115 2014). There is a strong correlation between the timing of Hog1 nuclear export and the restoration  
116 of cell volume (reflecting the turgor pressure recovery and cellular adaptation) (Muzzey et al., 2009).  
117 Thus, the duration of Hog1 nuclear localization serves as a proxy for the time needed for the cell to  
118 recover from a stress treatment: a shorter duration represents a faster adaptation while a longer  
119 duration represents a slower adaptation.

120 Using Hog1 nuclear localization as a reporter, we observed that a 45-min priming input with  
121 3  $\mu$ M PKA inhibitor (Fig. 1C) , which causes full PKA inhibition (Hao et al., 2013; Hao and O'Shea,  
122 2012), dramatically shortened the time needed to recover from hyperosmotic stress. Furthermore, the  
123 effect of this priming input decays with increasing break times (Fig. 1D). To quantify the effect of  
124 priming input and the dynamics of its decay, we measured and compared the durations of Hog1  
125 nuclear translocation with and without the priming input ( $T_{primed}$ ,  $T_{unprimed}$ ) for each break time. For  
126 instance, the priming input with a 10-min break time decreased the adaptation time by 34.7% from  
127 40 min to 26 min (Fig. 1E). We defined this percentage decrease in recovery  
128 time  $\left(\frac{T_{unprimed} - T_{primed}}{T_{unprimed}}\right) \times 100\%$  as a quantitative measure of the “memory effect” and use it  
129 throughout our report.

130

131 We then plotted the memory effect as a function of break time. Notably, we observed that the  
132 decay of memory effect is biphasic: About half of the memory effect was lost rapidly within 30  
133 minutes, whereas the remaining memory effect plateaued until 90 minutes and then declined slowly  
134 (Fig. 1F; Fig. S1). These biphasic memory dynamics were in contrast with the scenario where the  
135 memory is primarily mediated by the expression of stress-resistance genes (Berry and Gasch, 2008;  
136 Guan et al., 2012), which would follow an exponential decay trajectory as gene products are degraded  
137 during the break time. We termed the fast-decaying component “short-lived” memory and the longer-  
138 lasting component “long-lived” memory. To test whether the memory effect shows two phases under  
139 natural stress conditions, we used 0.5M KCl as the priming input and observed similar biphasic  
140 memory dynamics (Fig. S2), confirming that the memory pattern we found is not specific to chemical  
141 inhibition of PKA.

142

### 143 **Short- and long-lived memory can be selectively induced by different priming input** 144 **dynamics**

145 We next considered how changing the dynamics of priming inputs impacts cellular memory.  
146 To examine the effect of input duration on cellular memory, we exposed cells to a 15-min priming  
147 input with 3  $\mu$ M 1-NM-PP1 (Fig. 2A). In contrast to the response upon a 45-min priming input with  
148 the same amplitude, cells only exhibited the fast-decaying component of memory effect and the long-  
149 lasting phase is completely abolished (Fig. 2B, compare the blue versus dark pink curves). When  
150 cycloheximide was added to inhibit protein synthesis during the priming experiment, this short-lived  
151 memory effect was not affected (Fig. 2C), suggesting that short-lived memory does not depend on  
152 gene expression, but may instead be mediated by metabolites or post-translational protein  
153 modifications.

154 To further evaluate the effect of input amplitude on cellular memory, we treated cells with a  
155 45-min priming input with lower amplitude (0.75  $\mu$ M 1-NM-PP1), which causes partial inhibition of  
156 PKA (Hao et al., 2013; Hao and O'Shea, 2012)(Fig. 2D). Under this condition, the fast-decaying  
157 memory component and the plateau phase (0 – 90 minutes) of long-lived memory were both  
158 abolished (Fig. 2E, compare the orange versus dark pink curves). Instead, cells displayed a slow  
159 exponential decay trajectory, as would be expected if the memory effect is primarily mediated by gene  
160 expression. In accordance, CHX abolished this memory effect (Fig. 2F), confirming that it requires  
161 gene expression.

162 Taken together, these results demonstrated that the short- and long-lived components of  
163 cellular memory could be dissected by modulating the amplitude and duration of priming inputs and  
164 might be mediated by different molecular processes. Short-lived memory might be mediated through  
165 a fast translation-independent process, whereas an input duration-dependent slow gene expression  
166 process mediates the long-lasting memory, which could be further stabilized by another input  
167 amplitude-dependent mechanism. The three types of priming inputs used here are referred to as:  
168 “high-amplitude prolonged” (3  $\mu$ M 1-NM-PP1, 45 min); “high-amplitude transient” (3  $\mu$ M, 15 min);  
169 and “low-amplitude prolonged” (0.75  $\mu$ M, 45 min).

170

### 171 **Short-lived memory is mediated by trehalose synthesis and metabolism**

172 To determine the molecular process that mediates short-lived memory, we systematically  
173 deleted 5 known or putative PKA phosphorylation targets (Gph1, Ctt1, Nth1, Gcy1, and Tps1)  
174 involved in metabolic or stress-response pathways (Hwang et al., 1989; Schepers et al., 2012; Trevisol  
175 et al., 2014) and examined their roles in mediating memory effect. Among these PKA targets, we  
176 identified the trehalose synthase Tps1 (De Virgilio et al., 1993; Reinders et al., 1997), deletion of which  
177 abolished short-lived memory (Fig. 3A). Trehalose is a simple carbohydrate produced in many



178 organisms that acts as membrane protectant and protein stabilizer to enhance cell survival under  
179 stressful conditions (Hounsa et al., 1998). Note that the *tps1Δ hxxk2Δ* strain was used because *tps1Δ* is  
180 unable to grow on glucose, but this growth is restored in a *tps1Δ hxxk2Δ* double mutant (Hohmann et  
181 al., 1993). The deletion of *HXXK2* alone does not affect the memory effect (Fig. 3A). We further  
182 confirmed that the intracellular trehalose level is rapidly increased in response to the PKA inhibition  
183 input and that this increase is lost when Tps1 is deleted (Fig. 3B). Since trehalose has been shown to  
184 play an important role in cellular protection against osmotic stress (Hounsa et al., 1998), the increased  
185 level of trehalose by the priming input could temporarily enhance the acquired resistance to the  
186 subsequent osmotic stress, accounting for the observed short-lived memory.

187 To validate the central role of trehalose in short-lived memory, we manipulated its degradation.  
188 Nth1 is a trehalose degradation enzyme, the activity of which is also regulated by PKA-dependent  
189 phosphorylation (Schepers et al., 2012; Souza et al., 2002). We observed that, whereas short-term  
190 memory was abolished in the absence of Tps1, it became prolonged when *NTH1* is deleted (Fig. S3,  
191 compare the blue versus grey blue curves), suggesting that the activation of Nth1 accounts for the  
192 fast decay rate of the trehalose level. In other words, the duration of short-lived memory is encoded  
193 by the activity of Nth1.

194 To test whether Tps1 and trehalose also contribute to long-lived memory, we examined the  
195 memory dynamics in response to the high-amplitude prolonged input (3  $\mu$ M 1-NM-PP1, 45 min). We  
196 found that the absence of Tps1 completely abolished the fast-decaying component of memory, while  
197 long-lived memory remained unchanged (Fig. 3C, compare the red versus dark pink curves),  
198 indicating that trehalose synthesis and metabolism contribute exclusively to short-lived memory. In  
199 summary, these results showed that short-lived memory is mediated by PKA-dependent regulation  
200 of Tps1 and Nth1, which control trehalose synthesis and metabolism (Fig. 3D).

201

## 202 **Long-lived memory is mediated by stress-activated TFs and mRNP granules**

203 We next investigated the processes underlying long-lived memory, which is gene expression-  
204 dependent, as suggested above in Fig. 2F. To determine the TFs that induce this response, we  
205 systematically deleted 6 PKA-regulated stress-responsive TFs (Gis1, Sko1, Hot1, Yap1, and Msn2/4)  
206 (Charizanis et al., 1999; Gorner et al., 1998; Hinnebusch and Natarajan, 2002; Pascual-Ahuir et al.,  
207 2001; Proft et al., 2001; Roosen et al., 2005) and examined their roles in mediating memory effect.  
208 We found that, whereas the deletion of Msn2/4 completely abolished long-lived memory in response  
209 to the 45 minutes, 0.75  $\mu$ M 1-NM-PP1 priming input (Fig. S4A), the mutant showed only a partial  
210 loss of memory in response to the 3  $\mu$ M 1-NM-PP1 priming input (Fig. S4B), suggesting that another  
211 TF might play a compensatory role under this condition. As the deletion of Yap1 also dramatically  
212 diminished long-lived memory in response to the 0.75  $\mu$ M 1-NM-PP1 priming input (Fig. S4A), we  
213 generated the *msn2 $\Delta$  msn4 $\Delta$  yap1 $\Delta$*  triple mutant and observed a complete loss of long-lived memory  
214 in the triple mutant (Fig. S4B). These results identified Msn2/4 and Yap1 as primary TFs that mediate  
215 the transcriptional response generating long-lasting memory. Moreover, we observed that the short-  
216 and long-lived memories are both abolished in the triple mutant (Fig. 4A and B). This loss of short-  
217 lived memory in the triple mutant is consistent with previous studies (Hansen and O'Shea, 2013;  
218 Norbeck and Blomberg, 2000), which showed that the expression of *TPS1*, required for short-lived  
219 memory, is completely dependent on the TFs deleted in the triple mutant.

220 We then investigated the mechanism that stabilizes long-lived memory, underlying the plateau  
221 phase of memory that is maintained up to 90 minutes after the removal of priming inputs (Fig. 1F).  
222 Previous studies have revealed that, in response to stress or PKA inhibition, cells accumulate a  
223 number of stress-responsive gene mRNAs in cytoplasmic mRNP granules, called processing-bodies  
224 (PBs) and stress granules (SGs), which regulate mRNA translation, decay, and storage (Decker and  
225 Parker, 2012; Ramachandran et al., 2011; Wang et al., 2018; Zid and O'Shea, 2014). PKA regulates

226 the formation of these mRNP granules by phosphorylating a PB scaffolding protein, Pat1  
227 (Ramachandran et al., 2011). To test whether mRNP granules contribute to the memory effect, we  
228 deleted Pat1, which is essential for the formation of PBs (Buchan et al., 2008; Ramachandran et al.,  
229 2011). We observed that the plateau phase of long-lived memory was abolished in the *pat1Δ* strain  
230 and the memory effect exhibited a continuous decay (Fig. 4C, compare the red versus dark pink  
231 curves), indicating that PBs are required for maintaining the plateau phase. PBs and SGs are discrete  
232 but functionally interacting compartments. Some mRNAs in PBs can be stored in a translationally  
233 silenced state during stress and then return to translation via SGs upon stress removal (Buchan et al.,  
234 2008; Decker and Parker, 2012). To determine the role of SGs in memory, we examined memory  
235 dynamics in the absence of the SG component Pub1 (Buchan et al., 2008). We observed that, similar  
236 to *pat1Δ*, *pub1Δ* cells no longer exhibited the plateau phase of memory (Fig. 4D, compare the red  
237 versus dark pink curves). We note that *pub1Δ* cells have similar growth rate to that of WT throughout  
238 the experiments, indicating that the plateau phase observed in WT is not related to cell growth rate.  
239 These results suggested that the plateau phase of long-lived memory is dependent on the PBs/SGs-  
240 mediated mRNA storage pathway. Notably, *pat1Δ* and *pub1Δ* showed higher memory levels than  
241 those of WT for shorter break times (Fig. 4C and D, 15 - 30 mins), in agreement with the role of  
242 PBs/SGs in mRNA translational silencing in addition to storage.

243 Furthermore, to confirm the localization of the mRNAs of stress responsive genes to mRNP  
244 granules, we used the MS2 coat protein (MS2-CP) fused to GFP (Bertrand et al., 1998; Haim-  
245 Vilmovsky and Gerst, 2009) to visualize the mRNAs of two well-characterized PKA-regulated stress  
246 responsive genes, *DCS2* and *SIP18* (AkhavanAghdam et al., 2016; Hansen and O'Shea, 2013) in living  
247 cells. We observed that, in response to the 3  $\mu$ M 1-NM-PP1 input, the mRNAs of *DCS2* and *SIP18*  
248 formed foci that co-localized with PBs as indicated by the PB marker Dcp2-mCherry (Bregues et  
249 al., 2005) as well as some distinct granules (Fig. 4E). We have previously observed a similar localization

250 pattern for Msn2/4 targets, such as *GLC3* and *HXK1*, during glucose starvation (Zid and O'Shea,  
251 2014). This localization pattern coincided with poor protein production from these mRNAs during  
252 stress, suggesting that these stress-induced mRNAs are translationally silenced and stored in mRNP  
253 granules to confer long-lasting cellular memory.

254 Taken together, these findings uncovered that two processes, gene transcription and mRNA  
255 storage by mRNP granules, operate together to generate long-lived memory (Fig. 4F).

256

### 257 **Computational modeling suggested the network-mediated encoding of memory** 258 **dynamics**

259 From the experimental analysis described above, we delineated the regulatory processes that  
260 mediate cellular memory. To quantitatively understand the dynamic encoding of memory, we  
261 constructed a computational model. In the model, the network is composed of two memory-encoding  
262 motifs, one for short-lived memory and the other for long-lived memory (Fig. 4F). The short-lived  
263 memory motif comprises a fast process, in which PKA regulates the activities of Tps1 and Nth1 by  
264 phosphorylation (Schepers et al., 2012; Trevisol et al., 2014). In response to PKA inhibition, Tps1 is  
265 activated, boosting trehalose production; at the same time, Nth1 is inhibited, slowing down trehalose  
266 degradation. As a result, the trehalose level increases rapidly. Subsequently, when the PKA inhibition  
267 input is removed, Tps1 is inhibited while Nth1 is activated, leading to a rapid decline in trehalose  
268 levels during the break time. This feedforward loop enables quick tuning of trehalose levels,  
269 accounting for the fast-changing component of memory effect. The long-lived memory motif consists  
270 of two processes that function together to regulate gene expression dynamics, a transcriptional  
271 response mediated by TFs Yap1 and Msn2/4 (Smith et al., 1998) and a mRNA storage process  
272 mediated by Pat1 (Decker and Parker, 2012). A detailed description of the model is included in the  
273 Supplemental Materials.

274 With computationally obtained best-fit parameters, our model reproduced all the experimental  
275 data (Fig. S5). In particular, in our model, the high-amplitude transient input (Fig. 5A, left panel)  
276 specifically induces the trehalose production process (Fig. 5A, middle panel), generating the fast-  
277 decaying memory (Fig. 5A, right panel, compare with data in Fig. 2B). The low-amplitude prolonged  
278 input (Fig. 5B, left panel) only induce the transcriptional response but not the mRNP granule  
279 formation, because the input is too weak, (Fig. 5B, middle panel), resulting in a slow exponential  
280 decay of the memory effect after input removal (Fig. 5C, right panel, compare with data in Fig. 2E).  
281 The high-amplitude prolonged input (Fig. 5C, left panel), however, leads to co-activation of the fast  
282 trehalose production and the slow transcriptional response with mRNA storage by mRNP granules  
283 (Fig. 5C, middle panel). Once the transcriptional response is initiated, a portion of the newly  
284 synthesized stress resistance gene mRNAs is stored in mRNP granules via PKA regulation of Pat1.  
285 Upon input removal, these mRNAs are slowly released and translated, resulting in a long-lasting (up  
286 to ~90 minutes) memory plateau (Fig. 5C, right panel, compare with data in Fig. 1F). Consistent with  
287 the model, we observed that only the high-amplitude prolonged input strongly induced the formation  
288 of mRNP granules, as indicated by *DCS2* mRNA foci, whereas the high-amplitude transient input or  
289 low-amplitude prolonged input could not (Fig. 5, right panel insets). These live-cell mRNA results  
290 support our model in which the formation and function of mRNP granules depend on both the input  
291 amplitude and duration. In summary, our model suggested that the three PKA-regulated processes,  
292 trehalose metabolism, gene transcription and mRNP granule formation, operate and coordinate in a  
293 temporal order to enable the biphasic memory dynamics observed experimentally.

294 Moreover, our model could nicely reproduce the memory dynamics observed in the mutants  
295 of key regulatory factors. In the absence of Tps1, the priming input cannot induce the production of  
296 trehalose (Fig. S6A, middle panel), resulting in a loss of the fast decaying component of memory,  
297 while the long-lived memory remains intact (Fig. S6A, right panel, compare with data in Fig. 3C).

298 When the TFs Msn2/4 and Yap1 are deleted, the priming input can no longer induce the expression  
299 of stress resistance genes, resulting in a loss of long-lived memory. Meanwhile, the absence of these  
300 TFs leads to the loss of Tps1 expression that is required for the short-lived memory (Fig. S6B, middle  
301 panel). As a result, both short- and long-lived memories are completely abolished (Fig. S6B, right  
302 panel, compare with data in Fig. 4A). When Pat1 is deleted, the newly synthesized mRNAs, induced  
303 by the priming input, can no longer be stored in mRNP granules (Fig. S6C, middle panel), but instead  
304 they undergo immediate translation, resulting in a higher initial level of stress resistance than that of  
305 WT (during break time 0 – 30 min). This stress resistance, however, decays more quickly, as the gene  
306 products are being directly and continuously degraded, and cells can no longer maintain a plateau of  
307 long-lived memory (Fig. S6C, right panel, compare with data in Fig. 4C).

308

### 309 **Model prediction and experimental validation**

310 To further test our model, we used it to predict the memory dynamics in response to a  
311 combined pattern of priming input. Neither low-amplitude prolonged input nor high-amplitude  
312 transient input can induce the plateau phase of memory (Fig. 2B and E), yet our model predicted that  
313 these two inputs, when applied sequentially (Fig. 6A), should be capable of generating a memory  
314 plateau phase that is Pat1 dependent (Fig. 6B, “Prediction”). In this scenario, the low-amplitude  
315 prolonged input would first produce a high level of mRNAs, and then the subsequent high-amplitude  
316 transient input would induce mRNP granules to store newly synthesized mRNAs, enabling the plateau  
317 phase. This prediction is intriguing because it illustrates that the memory effect to the combined input  
318 is not simply the sum of the effects to the two single inputs (Fig. 6B, “Prediction”, compare the purple  
319 versus light pink curves) and this is attributed to the mRNP-dependent storage mechanism. Therefore,  
320 since the memory-encoding processes are largely independent, when the mRNA storage process is  
321 removed in the *pat1*Δ mutant, the memory effects would become additive (Fig. 6C, “Prediction”). We

322 experimentally tested these predictions, and, in agreement with the model, we observed a plateau  
323 phase of memory in response to the combined input (Fig. 6B, “Experiment”). Moreover, in the  
324 absence of Pat1, the plateau phase was abolished and the memory dynamics largely resembled the  
325 sum of memory effects to the two single inputs (Fig. 6C, “Experiment”), consistent with the model  
326 prediction.

327         These results validated our model and demonstrated its predictive power. Given that the  
328 memory-encoding processes are kinetically separated, the model-guided analysis open a powerful  
329 possibility to rationally design patterns of priming input and reprogram the temporal order of  
330 regulatory processes for generating desired forms of memory dynamics.



## 331 **Discussion**

332 Cellular memory allows cells to adjust their responses to environmental cues based on their  
333 prior experience. In this study, we used GSR in yeast *Saccharomyces cerevisiae* as a model system and  
334 demonstrated that the memory effect on stress adaptation is biphasic, comprised of a fast decaying  
335 component (short-lived memory), mediated by post-translational regulation of the trehalose  
336 metabolism pathway, and a long-lasting component (long-lived memory), mediated by TFs and  
337 mRNP granules. These memory-encoding processes are mediated by PKA, a deeply conserved kinase  
338 with a central role in many molecular and cellular processes that is also associated with diverse diseases  
339 (Chiaradonna et al., 2008; Skalhegg and Tasken, 2000). Due to the functional pleiotropy of PKA, it  
340 has been difficult to target pharmacologically to achieve therapeutic specificity. Here we found that  
341 different PKA signaling dynamics, depending on the input amplitude and duration, could selectively  
342 induce specific downstream pathways or processes, leading to distinct memory dynamics. These  
343 results raise the possibility of perturbing the dynamics of signaling hubs for specific therapeutic  
344 outcomes (Behar et al., 2013; Li et al., 2017b).

345 Among the PKA-controlled processes, we want to emphasize the functional role of mRNP  
346 granules in maintaining cellular memory, which we revealed in this study. Cytoplasmic mRNP  
347 granules, such as PBs and SGs, play important roles in controlling the translation, degradation and  
348 storage of mRNAs upon environmental changes (Decker and Parker, 2012). Previous efforts have  
349 been focused on elucidating the biochemical and biophysical characteristics of mRNP granules  
350 (Mitchell and Parker, 2014). However, their functional roles in cell physiology remain largely unclear.  
351 Recent studies have begun to relate mRNP granules with cellular memory formation (Caudron and  
352 Barral, 2013; Chakrabortee et al., 2016; Dine et al., 2018; Standart and Weil, 2018). Our findings here  
353 provide independent strong evidence that the PKA-regulated mRNP granules contribute to a long-  
354 lasting memory of previous environmental challenges and facilitate the adaptation to future stresses.



355 Further analyses will systematically determine the identities of these stored mRNAs that mediate the  
356 memory effect, the detailed mechanisms that direct these mRNAs to mRNP granules, and the  
357 prevalence of this mRNP-dependent memory effect in regulating other cellular responses, such as the  
358 hormetic effect on aging (Mattson, 2008).

359 In addition, through our modeling analysis, we obtained a quantitative understanding about  
360 the dynamics of cellular memory and the regulatory network that controls these dynamics, both of  
361 which remained largely missing from previous studies. The classic memory-generating networks  
362 feature positive feedback loops that give rise to bistability, underlying the mechanisms for irreversible  
363 processes such as cell-type differentiation (Chang et al., 2010; Wang et al., 2009; Xiong and Ferrell,  
364 2003). In contrast, the network we identified is comprised of multiple parallel pathways with highly  
365 diversified inherent kinetics. This network architecture confers signal processing capability and  
366 plasticity in shaping memory dynamics, enabling cells to determine their memory patterns in response  
367 to rapidly changing environments. In particular, this system couples two low-pass filters with different  
368 thresholds to effectively separate the short-term responses to transient signals from the chronic ones  
369 to prolonged signals. Moreover, the system also features a PKA-regulated mRNP granule formation  
370 process, which represents a new network motif for biological information storage. The initiation of  
371 the storage depends on the input amplitude, whereas how long the storage can last depends on the  
372 amount of newly synthesized mRNAs being localized in the granules and hence depends on both the  
373 amplitude and the duration of priming inputs. In this way, mRNP granules enable cells to integrate  
374 the information about input amplitude and duration and tune the dynamics of their memory. Guided  
375 by the dynamic regulatory schemes revealed by modeling, we further designed priming input patterns  
376 to reprogram the temporal order of fast- and slow-acting processes in the network and reshape the  
377 memory dynamics. For future studies, advanced fluorescent reporters and imaging technologies  
378 (Aizer et al., 2014; Standart and Weil, 2018) could be employed to track the explicit spatiotemporal

379 dynamics of key species in the model, such as mRNAs and mRNP granules, in single cells. These  
380 would enable us to constrain and improve our model and, ultimately, enhance the predictive power  
381 of the model. We anticipate that a quantitative and predictive understanding of memory control  
382 represents opportunities for broader and more effective use of priming treatments as a low-cost non-  
383 genetic approach for stress management in agriculture, biotechnology, and clinical intervention.

384 Finally, we want to highlight the biological relevance of our findings. We revealed that, because  
385 the molecular processes governing the two memory components have distinct kinetic properties,  
386 short- and long-lived memories could be selectively induced by different dynamics of priming inputs.  
387 Whereas a high amplitude transient input induces fast decaying memory that enables short-term stress  
388 resistance, a prolonged input elicits long-lasting memory conferring long-term stress resistance. This  
389 regulatory scheme is analogous to the fast responding innate immune response and the long-lasting  
390 adaptive immune response in mammals. Moreover, the mRNP granules are responsive to the  
391 amplitude and duration of inputs and can function as a knob to further tune the duration of the long-  
392 term memory component based on the input dynamics. Taken together, this integrated regulatory  
393 network enables cells to process the information of a previous stress encounter and determine how  
394 long they need to keep the memory about it. We speculate that this type of regulation may represent  
395 a strategy for cells to optimize resource allocation for future challenge preparation and may be widely  
396 applicable to organisms living in rapidly changing environments. Furthermore, given that this  
397 regulation is readily tunable, cells would be able to evolve their memory dynamics through natural  
398 selection to match the environmental fluctuations in their habitats.

399

400 **Acknowledgements**

401 This work was supported by NIH R01 GM111458 (to N.H.) and NIH R35 GM128798 (to B.M.Z.).

402

403 **Author Contributions**

404 Conceptualization, Y.J., Z.A., Y.L., B.Z., and N.H.; Methodology, Y.J., Z.A., Y.L., B.Z., and N.H.;

405 Investigation, Y.J., Z.A., Y.L.; Formal Analysis, Y.J., Z.A., Y.L.; Writing - Original Draft, Y.J., Z.A.,

406 Y.L., and N.H.; Writing - Review & Editing, Y.J., Z.A., Y.L., B.Z., and N.H.; Resources, N.H.;

407 Supervision, N.H.; Funding Acquisition, N.H.

408

409 **Declaration of Interests**

410 The authors declare no competing interests.

411

## 412 **Materials and Methods**

413

### 414 **Strain Construction**

415 Standard methods for the growth, maintenance, and transformation of yeast and bacteria and for  
416 manipulation of DNA were used throughout. All *Saccharomyces cerevisiae* strains used in this study are  
417 derived from the W303 background (*MATa leu2-3,112 trp1-1 can1-100 ura3-1 ade2-1 his3-11,15 GAL+*  
418 *psi+ ADE+*). The strains used in this study are listed in Table 1.

419

### 420 **Microfluidics**

421 The previously reported Y-shape microfluidic device (AkhavanAghdam et al., 2016; Hao and O'Shea,  
422 2012) with two inlets has been modified to accommodate three inlets on a single device and used in  
423 this study. The device fabrication and the setup of microfluidic experiments were performed as  
424 described previously (AkhavanAghdam et al., 2016; Hansen et al., 2015; Hao et al., 2013; Hao and  
425 O'Shea, 2012; Jiang et al., 2017).

426

### 427 **Time-lapse microscopy**

428 All time-lapse microscopy experiments were performed using a Nikon Ti-E inverted fluorescence  
429 microscope with an Andor iXon X3 DU897 EMCCD camera and a Spectra X LED light source. A  
430 CFI Plan Apochromat Lambda DM 60X Oil Immersion Objective (NA 1.40 WD 0.13MM) was used  
431 for all experiments. Three positions were chosen for each microfluidics channel. For each position,  
432 phase contrast, YFP, mCherry, and iRFP images were taken sequentially every two minutes. When  
433 the acquisition of the image series started, cells loaded in the microfluidic device were maintained in  
434 synthetic complete medium (SC, 2% dextrose) for the first five minutes before the introduction of 1-  
435 NM-PP1. Media input was switched manually between SC medium, SC medium with 1-NM-PP1 and  
436 SC medium with KCl at the indicated time points. The exposure and intensity settings for each  
437 fluorescence channel were set the same as that used in our earlier work (AkhavanAghdam et al., 2016).

438

439 For the priming experiments, cells were inoculated from a YPD plate into 2 ml SC liquid media two  
440 days before the experiment. On the second day, saturated cells were diluted by 1:20,000 into fresh SC  
441 media and grown overnight to reach OD = 0.6. These exponentially growing cells were diluted by 1:2  
442 and grown for another 2 hours before being loaded into the microfluidic devices.

443

### 444 **Image analysis**

445 The images were processed using a custom MATLAB code for single-cell tracking and fluorescence  
446 quantification. The whole cell was segmented using the phase contrast images while the nucleus was  
447 segmented using the iRFP images. The cytoplasm was obtained by taking the difference of the whole  
448 cell and the nucleus. The nuclear to cytoplasmic ratios of Hog1-YFP were calculated using the mean  
449 fluorescence intensities of Hog1-YFP in the nucleus and in the cytoplasm. The ratios were subtracted  
450 by baseline which is the ratio right before KCl was introduced (close to 1) and then plotted against  
451 the time. The duration of Hog1 translocation for each condition was quantified using the full width  
452 at half maximum (FWHM) and used to calculate the memory effect for each break time, as illustrated  
453 in Fig. S1. We determine the sample size of our single-cell data based on similar studies published  
454 previously (AkhavanAghdam et al., 2016; Hansen and O'Shea, 2013; Hao et al., 2013; Hao and O'Shea,  
455 2012).

456

### 457 **Trehalose assay**

458 Trehalose level was measured using the trehalose assay kit (Megazyme). Using this assay, trehalose

459 was converted into gluconate-6-phosphate, generating NADPH in a two-step reaction; the NADPH  
460 concentration can be determined by measuring the absorbance at 340 nm. To determine trehalose  
461 concentrations, 13 mL of yeast culture at  $OD \approx 0.5$  was harvested and put on ice for 5 minutes before  
462 centrifuged for 5 min at 4 °C. Cells were then washed with 0.1 M phosphate buffer (pH 5.9) to remove  
463 glucose in media. After the wash, cells were resuspended in 1 ml 0.25 M  $Na_2CO_3$  solution and OD  
464 was measured. Additional  $Na_2CO_3$  solution was added to make the cell densities (OD) the same for  
465 0 and 20 min samples. Samples (~1 mL) were boiled for 20 min to release intracellular trehalose.  
466 After cooling, the samples were centrifuged at 12 000 g for 3 min to remove cell debris. Two aliquots  
467 (300  $\mu$ l) of supernatant were transferred to two new tubes with one tube for total glucose level and  
468 the other one for pre-existing glucose level. The following reagents were then added to the cell lysates  
469 sequentially: 150  $\mu$ l acetic acid (1 M), 650  $\mu$ l distilled water, 100  $\mu$ l imidazole buffer (2 M imidazole,  
470 100 mM magnesium chloride and 0.02% w/v sodium azide; pH 7.0), 50  $\mu$ l NADP<sup>+</sup> /ATP (12.5  
471 mg/mL NADP<sup>+</sup> and 36.7 mg/mL ATP) and 10  $\mu$ l suspension of HK/G-6-PDH (425 U/mL  
472 hexokinase and 212 U/mL glucose-6-phosphate dehydrogenase), 10  $\mu$ l trehalase (490 U/mL). The  
473 mixtures were incubated at room temperature for 5 min for the reactions. Absorbance at 340 nm was  
474 recorded to determine the trehalose concentration in solution first. To estimate the intracellular  
475 concentration, we assumed that cell density at  $OD=1$  is  $1 \times 10^7$  cells/ml and yeast cell volume is 42 fl.  
476 Pre-existing glucose was determined in a control reaction without added trehalase.

477

#### 478 **Live-cell mRNA visualization**

479 The MS2-CP strains for mRNA visualization were constructed as described previously (Zid and  
480 O'Shea, 2014). The promoter and the coding region of genes of interest (e.g. *DCS2*) were amplified  
481 by PCR and then inserted into a template vector, which contains 12x MS2 loop sequences in the  
482 integration vector pRS305. The plasmid was linearized by EcoRV and integrated into W303  
483 background yeast strain with PKA analog-sensitive mutations (NH084) at the *LEU2* locus. A plasmid  
484 that constitutively expresses MS2 coat proteins fused with GFP driven by *MYO2* promoter (Zid and  
485 O'Shea, 2014) was also integrated into the same strain at *HIS3* locus. To visualize the colocalization  
486 of mRNAs and PBs, a pRS304 plasmid that expresses *DCP2*-mCherry under the native *DCP2*  
487 promoter was integrated into the same strain at *TRP1* locus (NH0857).

488

489 To perform live-cell mRNA visualization, cells were cultured to OD 0.6 and then loaded into  
490 microfluidic devices for time-lapse microscopy. For each position, phase contrast, mCherry, GFP and  
491 iRFP images were taken sequentially every two minutes. When the image acquisition started, cells  
492 were maintained in SD media for the first five minutes to obtain a baseline for each fluorescence  
493 channel prior to the introduction of 3  $\mu$ M 1-NM-PP1 treatment.

494

495 The exposure and intensity settings for each channel were set as follows: GFP 200 ms at 9% lamp  
496 intensity, mCherry 1s at 10% lamp intensity, and iRFP 300 ms at 15% lamp intensity.

497

#### 498 **Computational Modeling**

499 Our model focuses on the PKA-dependent memory-encoding network, comprised of the  
500 experimentally-identified processes that regulate the levels of metabolites or proteins needed for  
501 enhancing stress adaptation, including trehalose and stress resistance gene products. The input of the  
502 model is the PKA inhibition signal (priming input). For the model output, we assume that the memory  
503 effect linearly depends on the sum of the amounts of trehalose and stress resistance gene products in  
504 most of the kinetic regimes, unless the substance concentrations reach extremely high levels. This  
505 assumption leaves out the explicit inclusion of the downstream Hog1 pathway in our model and

506 simplifies our analysis. The network consists of three molecular processes, trehalose metabolism,  
507 stress resistance gene transcription and mRNP granule formation, all of which are PKA regulated.  
508  
509 For trehalose metabolism, PKA regulates both trehalose production and degradation by  
510 phosphorylating Tps1 and Nth1, respectively. More specifically, PKA-mediated phosphorylation  
511 inhibits Tps1 activity and enhances Nth1 activity based on the previous reports. Because the  
512 regulation is primarily through phosphorylation, we assume that it is a fast process. For stress  
513 resistance gene expression, PKA regulates mRNA transcription through transcription factors and  
514 regulates mRNA translation and degradation through mRNP granules. More specifically, the PKA  
515 inhibition input activates transcription factors and mRNP granules. Once the mRNP granules are  
516 activated, a portion of the newly synthesized mRNAs is stored in mRNP granules where their  
517 translation and degradation are paused. Upon input removal, these mRNAs are slowly released,  
518 resuming their translation and degradation. Because gene transcription is a multi-step process, we  
519 assume that it is a relatively slow process; in contrast, because PKA regulates mRNP granules through  
520 phosphorylation, we assume that it is a relatively fast process. It should be noted that the level of  
521 Tps1 is also dependent on PKA-regulated gene expression, resulting in a connection between the  
522 trehalose metabolism pathway and the gene expression process. Based on the experimental  
523 observations, these three processes have different dependence on input amplitude and duration.  
524 Trehalose metabolism and mRNP granules can only be activated in response to high-amplitude  
525 inputs; by contrast, mRNA transcription can be induced by low-amplitude input but a prolonged  
526 duration is needed.

527 Computational modeling and all the simulations were done using the MATLAB. The model contains  
528 13 variables and 27 independent parameters. The function “lsqnonlin” was used for data fitting. The  
529 data of three dynamic inputs and three mutants (*tps1Δ*, *pat1Δ*, *msn2/4Δ yap1Δ*) were used for data  
530 fitting (Fig. S5). To highlight the role of mRNP granules, time points for long-lived memory plateau  
531 (Fig. 1F) were weighted by 20-fold for data fitting. Fitting starting with completely random guesses  
532 failed. Therefore, we first manually chose parameter values that can qualitatively capture the data and  
533 then used these manually-chosen parameters as the initial guesses for computational fitting. In order  
534 to overcome the local minimum, we also tested 10 random sets of initial guesses which are randomly  
535 chosen within 8 fold (1/8 to 8) of our first set of guesses and compared the squared norm of the  
536 residuals of the final fitting results and then selected the best-fit set of parameter values.

537  
538 The initial conditions are provided in Table S1. Reactions and rate constants are provided in Table  
539 S2.

540

541

#### 542 **Model Equations:**

543

$$544 \frac{d[TF_a]}{dt} = k_{11} \cdot [TF_i] - \frac{k_{12} \cdot PKA^4}{KM_3^4 + PKA^4} \cdot [TF_a]$$

545

$$546 \frac{d[TF_i]}{dt} = -k_{11} \cdot [TF_i] + \frac{k_{12} \cdot PKA^4}{KM_3^4 + PKA^4} \cdot [TF_a]$$

547

$$548 \frac{d[Tps1RNA]}{dt} = \frac{k_{14} \cdot [TF_a]^2}{KM_8^2 + [TF_a]^2} + k_{15} - k_{16} \cdot [Tps1RNA]$$



549

$$550 \quad \frac{d[Tps1protein]}{dt} = k_{17} \cdot [Tps1RNA] - k_{13} \cdot [Tps1protein]$$

551

$$552 \quad \frac{d[Nth1_a]}{dt} = \frac{k_1 \cdot PKA \cdot [Nth1_i]}{KM_4 + [Nth1_i]} - \frac{k_2 \cdot [Nth1_a]}{KM_6 + [Nth1_a]}$$

553

$$554 \quad \frac{d[Nth1_i]}{dt} = \frac{-k_1 \cdot PKA \cdot [Nth1_i]}{KM_4 + [Nth1_i]} + \frac{k_2 \cdot [Nth1_a]}{KM_6 + [Nth1_a]}$$

555

$$556 \quad \frac{d[Trehalose]}{dt} = \frac{k_{19} \cdot KM_7^4}{KM_7^4 + PKA^4} \cdot [Tre6P] \cdot [Tps1protein] - \frac{k_{18} \cdot [Nth1_a]^4}{KM_9^4 + [Nth1_a]^4} \cdot [Trehalose]$$

557

$$558 \quad \frac{d[Tre6P]}{dt} = \frac{-k_{19} \cdot KM_7^4}{KM_7^4 + PKA^4} \cdot [Tre6P] \cdot [Tps1protein]$$

559

$$560 \quad \frac{d[Pat1_a]}{dt} = -k_4 \cdot [Pat1_a] + \frac{k_3 \cdot KM_1^4}{KM_1^4 + PKA^4} \cdot [Pat1_i] - (1 - PKA) \cdot k_6 \cdot [mRNAs] \cdot [Pat1_a]$$

$$561 \quad + \frac{k_5 \cdot [mRNPs]}{KM_2 + [mRNPs]}$$

562

$$564 \quad \frac{d[Pat1_i]}{dt} = k_4 \cdot [Pat1_a] - \frac{k_3 \cdot KM_1^4}{KM_1^4 + PKA^4} \cdot [Pat1_i]$$

565

$$566 \quad \frac{d[mRNPs]}{dt} = (1 - PKA) \cdot k_6 \cdot [mRNAs] \cdot [Pat1_a] - \frac{k_5 \cdot [mRNPs]}{KM_2 + [mRNPs]}$$

567

$$568 \quad \frac{d[mRNAs]}{dt} = k_{10} \cdot [TF_a] - k_9 \cdot [mRNAs] - (1 - PKA) \cdot k_6 \cdot [mRNAs] \cdot [Pat1_a] + \frac{k_5 \cdot [mRNPs]}{KM_2 + [mRNPs]}$$

569

$$570 \quad \frac{d[protein]}{dt} = k_8 \cdot [mRNAs] - k_7 \cdot [protein]$$

571

$$572 \quad output = [Trehalose] + \frac{0.25 \cdot [protein]^2}{0.0625 + [protein]^2}$$

573

574

575

576

577

578

579

580

581

582  
583

## Strains used in this study

| Strain                                                                                                                                                                                                  | Source     | identifier |
|---------------------------------------------------------------------------------------------------------------------------------------------------------------------------------------------------------|------------|------------|
| <i>W303 MATa leu2-3,112 trp1-1 can1-100 ura3-1 ade2-1 his3-11,15 GAL+ psi+ ADE+, TPK1-M164G, TPK2-M147G, TPK3-M165G, NHP6a-iRFP-kanMX, MSN2-mCherry-TRP1, HOG1-YFP-HIS3</i>                             | this study | NH0441     |
| <i>W303 MATa leu2-3,112 trp1-1 can1-100 ura3-1 ade2-1 his3-11,15 GAL+ psi+ ADE+, TPK1-M164G, TPK2-M147G, TPK3-M165G, NHP6a-iRFP-kanMX, MSN2-mCherry-TRP1, HOG1-YFP-HIS3, gpb1::cgURA3</i>               | this study | NH0562     |
| <i>W303 MATa leu2-3,112 trp1-1 can1-100 ura3-1 ade2-1 his3-11,15 GAL+ psi+ ADE+, TPK1-M164G, TPK2-M147G, TPK3-M165G, NHP6a-iRFP-kanMX, MSN2-mCherry-TRP1, HOG1-YFP-HIS3, nth1::cgURA3</i>               | this study | NH0565     |
| <i>W303 MATa leu2-3,112 trp1-1 can1-100 ura3-1 ade2-1 his3-11,15 GAL+ psi+ ADE+, TPK1-M164G, TPK2-M147G, TPK3-M165G, NHP6a-iRFP-kanMX, MSN2-mCherry-TRP1, HOG1-YFP-HIS3, ctt1::cgURA3</i>               | this study | NH0566     |
| <i>W303 MATa leu2-3,112 trp1-1 can1-100 ura3-1 ade2-1 his3-11,15 GAL+ psi+ ADE+, TPK1-M164G, TPK2-M147G, TPK3-M165G, NHP6a-iRFP-kanMX, MSN2-mCherry-TRP1, HOG1-YFP-HIS3, gcy1::cgURA3</i>               | this study | NH0574     |
| <i>W303 MATa leu2-3,112 trp1-1 can1-100 ura3-1 ade2-1 his3-11,15 GAL+ psi+ ADE+, TPK1-M164G, TPK2-M147G, TPK3-M165G, NHP6a-iRFP-kanMX, MSN2-mCherry-TRP1, HOG1-YFP-HIS3, hxx2::cgLEU2</i>               | this study | NH0581     |
| <i>W303 MATa leu2-3,112 trp1-1 can1-100 ura3-1 ade2-1 his3-11,15 GAL+ psi+ ADE+, TPK1-M164G, TPK2-M147G, TPK3-M165G, NHP6a-iRFP-kanMX, MSN2-mCherry-TRP1, HOG1-YFP-HIS3, hxx2::cgLEU2, tps1::cgURA3</i> | this study | NH0584     |
| <i>W303 MATa leu2-3,112 trp1-1 can1-100 ura3-1 ade2-1 his3-11,15 GAL+ psi+ ADE+, TPK1-M164G, TPK2-M147G, TPK3-M165G, NHP6a-iRFP-kanMX, MSN2-mCherry-TRP1, HOG1-YFP-HIS3, yap1::cgURA3</i>               | this study | NH0629     |
| <i>W303 MATa leu2-3,112 trp1-1 can1-100 ura3-1 ade2-1 his3-11,15 GAL+ psi+ ADE+, TPK1-M164G, TPK2-M147G, TPK3-M165G, NHP6a-iRFP-kanMX, MSN2-mCherry-TRP1, HOG1-YFP-HIS3, gis1::cgURA3</i>               | this study | NH0630     |
| <i>W303 MATa leu2-3,112 trp1-1 can1-100 ura3-1 ade2-1 his3-11,15 GAL+ psi+ ADE+, TPK1-M164G, TPK2-M147G, TPK3-M165G, NHP6a-iRFP-kanMX, MSN2-mCherry-TRP1, HOG1-YFP-HIS3, sko1::cgURA3</i>               | this study | NH0631     |
| <i>W303 MATa leu2-3,112 trp1-1 can1-100 ura3-1 ade2-1 his3-11,15 GAL+ psi+ ADE+, TPK1-M164G, TPK2-M147G, TPK3-M165G, NHP6a-iRFP-kanMX, MSN2-mCherry-TRP1, HOG1-YFP-HIS, hot1::cgURA3</i>                | this study | NH0633     |



|                                                                                                                                                                                                              |            |        |
|--------------------------------------------------------------------------------------------------------------------------------------------------------------------------------------------------------------|------------|--------|
| <i>W303 MATa leu2-3,112 trp1-1 can1-100 ura3-1 ade2-1 his3-11,15 GAL+ psi+ ADE+, TPK1-M164G, TPK2-M147G, TPK3-M165G, NHP6a-iRFP-kanMX, HOG1-mCitrine(V163A)-HIS, msn4::cgTRP1, msn2::natMX, yap1::cgURA3</i> | this study | NH0641 |
| <i>W303 MATa leu2-3,112 trp1-1 can1-100 ura3-1 ade2-1 his3-11,15 GAL+ psi+ ADE+, TPK1-M164G, TPK2-M147G, TPK3-M165G, NHP6a-iRFP-kanMX, MSN2-mCherry-TRP1, HOG1-YFP-HIS3, msn4::cgTRP1, msn2::natMX</i>       | this study | NH0442 |
| <i>W303 MATa leu2-3,112 trp1-1 can1-100 ura3-1 ade2-1 his3-11,15 GAL+ psi+ ADE+, TPK1-M164G, TPK2-M147G, TPK3-M165G, NHP6a-iRFP-kanMX, MSN2-mCherry-TRP1, HOG1-YFP-HIS3, pub1::cgURA3</i>                    | this study | NH0688 |
| <i>W303 MATa leu2-3,112 trp1-1 can1-100 ura3-1 ade2-1 his3-11,15 GAL+ psi+ ADE+, TPK1-M164G, TPK2-M147G, TPK3-M165G, NHP6a-iRFP-kanMX, MSN2-mCherry-TRP1, HOG1-YFP-HIS3, pat1::cgURA3</i>                    | this study | NH0689 |
| <i>W303 MATa leu2-3,112 trp1-1 can1-100 ura3-1 ade2-1 his3-11,15 GAL+ psi+ ADE+, TPK1-M164G, TPK2-M147G, TPK3-M165G, Nhp6a-iRFP:kanMX, MS2-CP-GFP-HIS3</i>                                                   | this study | NH0812 |
| <i>W303 MATa leu2-3,112 trp1-1 can1-100 ura3-1 ade2-1 his3-11,15 GAL+ psi+ ADE+, TPK1-M164G, TPK2-M147G, TPK3-M165G, Nhp6a-iRFP:kanMX, MS2-CP-GFP-HIS3, DCS2-12xMS2-LEU2, DCP2-mCherry-TRP1</i>              | this study | NH0857 |
| <i>W303 MATa leu2-3,112 trp1-1 can1-100 ura3-1 ade2-1 his3-11,15 GAL+ psi+ ADE+, TPK1-M164G, TPK2-M147G, TPK3-M165G, Nhp6a-iRFP:kanMX, MS2-CP-GFP-HIS3, SIP18-12xMS2-LEU2, DCP2-mCherry-TRP1</i>             | this study | NH0858 |

584  
585  
586

**Table S1. Initial conditions of all species in the model.**

| Species           | Initial conditions | Notes                                                 |
|-------------------|--------------------|-------------------------------------------------------|
| TF <sub>a</sub>   | 0                  | Active transcription factors, i.e. Msn2/4 and Yap1    |
| TF <sub>i</sub>   | 1                  | Active transcription factors                          |
| Tps1 mRNA         | 0.1                |                                                       |
| Tps1 protein      | 1                  |                                                       |
| Nth1 <sub>a</sub> | 0.2                | Active Nth1                                           |
| Nth1 <sub>i</sub> | 0                  | Inactive Nth1                                         |
| Trehalose         | 0                  |                                                       |
| Tre6P             | 0.35               | Trehalose precursor, i.e. trehalose-6-P               |
| Pat1 <sub>a</sub> | 0                  | Active Pat1                                           |
| Pat1 <sub>i</sub> | 0.9                | Inactive Pat1                                         |
| mRNPs             | 0                  | mRNPs that stores mRNAs and induced by PKA inhibition |
| mRNAs             | 0                  | Stress responsive mRNAs induced by PKA inhibition     |

|         |   |                                                      |
|---------|---|------------------------------------------------------|
| protein | 0 | Stress responsive proteins induced by PKA inhibition |
|---------|---|------------------------------------------------------|

587  
588  
589  
590

**Table S2. Best-fit parameter values used in the model.**

| Names                                                         | Parameters      | Values                                                                   |
|---------------------------------------------------------------|-----------------|--------------------------------------------------------------------------|
| PKA activity                                                  | PKA             | no inhibitor: 1<br>3 $\mu$ M1-NM-PP1: 0<br>0.75 $\mu$ M1-NM-PP1:<br>0.25 |
| Transcription factor activation rate                          | k <sub>11</sub> | 0.009 min <sup>-1</sup>                                                  |
| Transcription factor deactivation rate                        | k <sub>12</sub> | 50 min <sup>-1</sup>                                                     |
| Transcription factor deactivation equilibrium constant        | KM <sub>3</sub> | 1.3                                                                      |
| Basal level of Tps1 mRNA transcription                        | k <sub>15</sub> | 0.01 min <sup>-1</sup>                                                   |
| Tps1 mRNA transcription rate                                  | k <sub>14</sub> | 0.4 min <sup>-1</sup>                                                    |
| Tps1 mRNA degradation rate                                    | k <sub>16</sub> | 0.05 min <sup>-1</sup>                                                   |
| Tps1 translation rate                                         | k <sub>17</sub> | 0.005 min <sup>-1</sup>                                                  |
| Tps1 degradation rate                                         | k <sub>13</sub> | 0.005 min <sup>-1</sup>                                                  |
| Tps1 activation equilibrium constant                          | KM <sub>6</sub> | 0.01                                                                     |
| Tps1 mRNA transcription equilibrium constant                  | KM <sub>7</sub> | 0.04                                                                     |
| Nth1 activation rate                                          | k <sub>1</sub>  | 0.51 min <sup>-1</sup>                                                   |
| Nth1 deactivation rate                                        | k <sub>2</sub>  | 0.5 min <sup>-1</sup>                                                    |
| Nth1 activation equilibrium constant                          | KM <sub>4</sub> | 0.00001                                                                  |
| Nth1 deactivation equilibrium constant                        | KM <sub>5</sub> | 0.00001                                                                  |
| Trehalose production rate                                     | k <sub>19</sub> | 0.02 min <sup>-1</sup>                                                   |
| Trehalose decay rate (rate converting to downstream products) | k <sub>18</sub> | 0.41 min <sup>-1</sup>                                                   |
| Trehalose decay equilibrium constant                          | KM <sub>8</sub> | 0.2                                                                      |
| Pat1 activation rate                                          | k <sub>3</sub>  | 5 min <sup>-1</sup>                                                      |
| Pat1 deactivation rate                                        | k <sub>4</sub>  | 0.5 min <sup>-1</sup>                                                    |
| Pat1 activation equilibrium constant                          | KM <sub>1</sub> | 0.01                                                                     |
| mRNPs formation rate                                          | k <sub>6</sub>  | 5 min <sup>-1</sup>                                                      |
| mRNPs disassembly rate                                        | k <sub>5</sub>  | 0.01 min <sup>-1</sup>                                                   |
| mRNPs disassembly equilibrium constant                        | KM <sub>2</sub> | 0.01                                                                     |
| mRNA transcription rate                                       | k <sub>10</sub> | 0.16 min <sup>-1</sup>                                                   |
| mRNA degradation rate                                         | k <sub>9</sub>  | 0.02 min <sup>-1</sup>                                                   |
| Stress resistance protein translation rate                    | k <sub>8</sub>  | 3.2 min <sup>-1</sup>                                                    |
| Stress resistance protein degradation rate                    | k <sub>7</sub>  | 4 min <sup>-1</sup>                                                      |

591  
592  
593  
594  
595  
596  
597

598 **REFERENCES**

599

- 600 Aizer, A., Kalo, A., Kafri, P., Shraga, A., Ben-Yishay, R., Jacob, A., Kinor, N., and Shav-Tal, Y. (2014).  
601 Quantifying mRNA targeting to P-bodies in living human cells reveals their dual role in mRNA decay  
602 and storage. *J Cell Sci* *127*, 4443-4456.
- 603 AkhavanAghdam, Z., Sinha, J., Tabbaa, O.P., and Hao, N. (2016). Dynamic control of gene regulatory  
604 logic by seemingly redundant transcription factors. *Elife* *5*.
- 605 Behar, M., Barken, D., Werner, S.L., and Hoffmann, A. (2013). The dynamics of signaling as a  
606 pharmacological target. *Cell* *155*, 448-461.
- 607 Behar, M., and Hoffmann, A. (2010). Understanding the temporal codes of intra-cellular signals. *Curr*  
608 *Opin Genet Dev* *20*, 684-693.
- 609 Bennett, M.R., and Hasty, J. (2009). Microfluidic devices for measuring gene network dynamics in  
610 single cells. *Nat Rev Genet* *10*, 628-638.
- 611 Berry, D.B., and Gasch, A.P. (2008). Stress-activated genomic expression changes serve a preparative  
612 role for impending stress in yeast. *Mol Biol Cell* *19*, 4580-4587.
- 613 Berry, D.B., Guan, Q., Hose, J., Haroon, S., Gebbia, M., Heisler, L.E., Nislow, C., Giaever, G., and  
614 Gasch, A.P. (2011). Multiple means to the same end: the genetic basis of acquired stress resistance in  
615 yeast. *PLoS Genet* *7*, e1002353.
- 616 Bertrand, E., Chartrand, P., Schaefer, M., Shenoy, S.M., Singer, R.H., and Long, R.M. (1998).  
617 Localization of ASH1 mRNA particles in living yeast. *Mol Cell* *2*, 437-445.
- 618 Bishop, A.C., Ubersax, J.A., Petsch, D.T., Matheos, D.P., Gray, N.S., Blethrow, J., Shimizu, E., Tsien,  
619 J.Z., Schultz, P.G., Rose, M.D., *et al.* (2000). A chemical switch for inhibitor-sensitive alleles of any  
620 protein kinase. *Nature* *407*, 395-401.
- 621 Brengues, M., Teixeira, D., and Parker, R. (2005). Movement of eukaryotic mRNAs between  
622 polysomes and cytoplasmic processing bodies. *Science* *310*, 486-489.
- 623 Brewster, J.L., and Gustin, M.C. (2014). Hog1: 20 years of discovery and impact. *Sci Signal* *7*, re7.
- 624 Buchan, J.R., Muhlrud, D., and Parker, R. (2008). P bodies promote stress granule assembly in  
625 *Saccharomyces cerevisiae*. *J Cell Biol* *183*, 441-455.
- 626 Caudron, F., and Barral, Y. (2013). A super-assembly of Whi3 encodes memory of deceptive  
627 encounters by single cells during yeast courtship. *Cell* *155*, 1244-1257.
- 628 Chakrabortee, S., Byers, J.S., Jones, S., Garcia, D.M., Bhullar, B., Chang, A., She, R., Lee, L., Fremin,  
629 B., Lindquist, S., *et al.* (2016). Intrinsically Disordered Proteins Drive Emergence and Inheritance of  
630 Biological Traits. *Cell* *167*, 369-381 e312.
- 631 Chang, D.E., Leung, S., Atkinson, M.R., Reifler, A., Forger, D., and Ninfa, A.J. (2010). Building  
632 biological memory by linking positive feedback loops. *Proc Natl Acad Sci U S A* *107*, 175-180.
- 633 Charizanis, C., Juhnke, H., Kreams, B., and Entian, K.D. (1999). The oxidative stress response  
634 mediated via Pos9/Skn7 is negatively regulated by the Ras/PKA pathway in *Saccharomyces cerevisiae*.  
635 *Mol Gen Genet* *261*, 740-752.
- 636 Chiaradonna, F., Balestrieri, C., Gaglio, D., and Vanoni, M. (2008). RAS and PKA pathways in cancer:  
637 new insight from transcriptional analysis. *Front Biosci* *13*, 5257-5278.
- 638 De Virgilio, C., Burckert, N., Bell, W., Jenö, P., Boller, T., and Wiemken, A. (1993). Disruption of  
639 TPS2, the gene encoding the 100-kDa subunit of the trehalose-6-phosphate synthase/phosphatase  
640 complex in *Saccharomyces cerevisiae*, causes accumulation of trehalose-6-phosphate and loss of  
641 trehalose-6-phosphate phosphatase activity. *Eur J Biochem* *212*, 315-323.
- 642 Decker, C.J., and Parker, R. (2012). P-bodies and stress granules: possible roles in the control of  
643 translation and mRNA degradation. *Cold Spring Harb Perspect Biol* *4*, a012286.

- 644 Dine, E., Gil, A.A., Uribe, G., Brangwynne, C.P., and Toettcher, J.E. (2018). Protein Phase Separation  
645 Provides Long-Term Memory of Transient Spatial Stimuli. *Cell Syst* 6, 655-663 e655.
- 646 Durrant, W.E., and Dong, X. (2004). Systemic acquired resistance. *Annu Rev Phytopathol* 42, 185-  
647 209.
- 648 Gasch, A.P., Spellman, P.T., Kao, C.M., Carmel-Harel, O., Eisen, M.B., Storz, G., Botstein, D., and  
649 Brown, P.O. (2000). Genomic expression programs in the response of yeast cells to environmental  
650 changes. *Mol Biol Cell* 11, 4241-4257.
- 651 Gifford, G.E., and Lohmann-Matthes, M.L. (1987). Gamma interferon priming of mouse and human  
652 macrophages for induction of tumor necrosis factor production by bacterial lipopolysaccharide. *J*  
653 *Natl Cancer Inst* 78, 121-124.
- 654 Gorner, W., Durchschlag, E., Martinez-Pastor, M.T., Estruch, F., Ammerer, G., Hamilton, B., Ruis,  
655 H., and Schuller, C. (1998). Nuclear localization of the C2H2 zinc finger protein Msn2p is regulated  
656 by stress and protein kinase A activity. *Genes Dev* 12, 586-597.
- 657 Guan, Q., Haroon, S., Bravo, D.G., Will, J.L., and Gasch, A.P. (2012). Cellular memory of acquired  
658 stress resistance in *Saccharomyces cerevisiae*. *Genetics* 192, 495-505.
- 659 Haim-Vilmovsky, L., and Gerst, J.E. (2009). m-TAG: a PCR-based genomic integration method to  
660 visualize the localization of specific endogenous mRNAs in vivo in yeast. *Nat Protoc* 4, 1274-1284.
- 661 Hansen, A.S., Hao, N., and O'Shea, E.K. (2015). High-throughput microfluidics to control and  
662 measure signaling dynamics in single yeast cells. *Nat Protoc* 10, 1181-1197.
- 663 Hansen, A.S., and O'Shea, E.K. (2013). Promoter decoding of transcription factor dynamics involves  
664 a trade-off between noise and control of gene expression. *Mol Syst Biol* 9, 704.
- 665 Hao, N., Budnik, B.A., Gunawardena, J., and O'Shea, E.K. (2013). Tunable signal processing through  
666 modular control of transcription factor translocation. *Science* 339, 460-464.
- 667 Hao, N., and O'Shea, E.K. (2012). Signal-dependent dynamics of transcription factor translocation  
668 controls gene expression. *Nat Struct Mol Biol* 19, 31-39.
- 669 Hayes, M.P., Freeman, S.L., and Donnelly, R.P. (1995). IFN-gamma priming of monocytes enhances  
670 LPS-induced TNF production by augmenting both transcription and mRNA stability. *Cytokine* 7,  
671 427-435.
- 672 Hilker, M., Schwachtje, J., Baier, M., Balazadeh, S., Baurle, I., Geiselhardt, S., Hinch, D.K., Kunze,  
673 R., Mueller-Roeber, B., Rillig, M.C., *et al.* (2016). Priming and memory of stress responses in organisms  
674 lacking a nervous system. *Biol Rev Camb Philos Soc* 91, 1118-1133.
- 675 Hinnebusch, A.G., and Natarajan, K. (2002). Gcn4p, a master regulator of gene expression, is  
676 controlled at multiple levels by diverse signals of starvation and stress. *Eukaryot Cell* 1, 22-32.
- 677 Hohmann, S., Neves, M.J., de Koning, W., Alijo, R., Ramos, J., and Thevelein, J.M. (1993). The  
678 growth and signalling defects of the *ggs1* (*fdp1/byp1*) deletion mutant on glucose are suppressed by  
679 a deletion of the gene encoding hexokinase PII. *Curr Genet* 23, 281-289.
- 680 Hounsa, C.G., Brandt, E.V., Thevelein, J., Hohmann, S., and Prior, B.A. (1998). Role of trehalose in  
681 survival of *Saccharomyces cerevisiae* under osmotic stress. *Microbiology* 144 (*Pt 3*), 671-680.
- 682 Hwang, P.K., Tugendreich, S., and Fletterick, R.J. (1989). Molecular analysis of GPH1, the gene  
683 encoding glycogen phosphorylase in *Saccharomyces cerevisiae*. *Mol Cell Biol* 9, 1659-1666.
- 684 Jiang, Y., AkhavanAghdam, Z., Tsimring, L.S., and Hao, N. (2017). Coupled feedback loops control  
685 the stimulus-dependent dynamics of the yeast transcription factor Msn2. *J Biol Chem* 292, 12366-  
686 12372.
- 687 Levine, J.H., Lin, Y., and Elowitz, M.B. (2013). Functional roles of pulsing in genetic circuits. *Science*  
688 342, 1193-1200.
- 689 Li, Y., Jin, M., O'Laughlin, R., Bittihn, P., Tsimring, L.S., Pillus, L., Hasty, J., and Hao, N. (2017a).  
690 Multigenerational silencing dynamics control cell aging. *Proc Natl Acad Sci U S A* 114, 11253-11258.



- 691 Li, Y., Roberts, J., AkhavanAghdam, Z., and Hao, N. (2017b). Mitogen-activated protein kinase  
692 (MAPK) dynamics determine cell fate in the yeast mating response. *J Biol Chem* *292*, 20354-20361.
- 693 Lou, Y., and Yousef, A.E. (1997). Adaptation to sublethal environmental stresses protects *Listeria*  
694 *monocytogenes* against lethal preservation factors. *Appl Environ Microbiol* *63*, 1252-1255.
- 695 Martinez-Pastor, M.T., Marchler, G., Schuller, C., Marchler-Bauer, A., Ruis, H., and Estruch, F. (1996).  
696 The *Saccharomyces cerevisiae* zinc finger proteins Msn2p and Msn4p are required for transcriptional  
697 induction through the stress response element (STRE). *EMBO J* *15*, 2227-2235.
- 698 Matsumoto, H., Hamada, N., Takahashi, A., Kobayashi, Y., and Ohnishi, T. (2007). Vanguard of  
699 paradigm shift in radiation biology: radiation-induced adaptive and bystander responses. *J Radiat Res*  
700 *48*, 97-106.
- 701 Mattson, M.P. (2008). Hormesis defined. *Ageing Res Rev* *7*, 1-7.
- 702 Mitchell, S.F., and Parker, R. (2014). Principles and properties of eukaryotic mRNPs. *Mol Cell* *54*,  
703 547-558.
- 704 Muzzey, D., Gomez-Urbe, C.A., Mettetal, J.T., and van Oudenaarden, A. (2009). A systems-level  
705 analysis of perfect adaptation in yeast osmoregulation. *Cell* *138*, 160-171.
- 706 Netea, M.G., Latz, E., Mills, K.H., and O'Neill, L.A. (2015). Innate immune memory: a paradigm  
707 shift in understanding host defense. *Nat Immunol* *16*, 675-679.
- 708 Norbeck, J., and Blomberg, A. (2000). The level of cAMP-dependent protein kinase A activity  
709 strongly affects osmotolerance and osmo-instigated gene expression changes in *Saccharomyces*  
710 *cerevisiae*. *Yeast* *16*, 121-137.
- 711 Pascual-Ahuir, A., Posas, F., Serrano, R., and Proft, M. (2001). Multiple levels of control regulate the  
712 yeast cAMP-response element-binding protein repressor Sko1p in response to stress. *J Biol Chem*  
713 *276*, 37373-37378.
- 714 Prime, A.P.G., Conrath, U., Beckers, G.J., Flors, V., Garcia-Agustin, P., Jakab, G., Mauch, F.,  
715 Newman, M.A., Pieterse, C.M., Poinssot, B., *et al.* (2006). Priming: getting ready for battle. *Mol Plant*  
716 *Microbe Interact* *19*, 1062-1071.
- 717 Proft, M., Pascual-Ahuir, A., de Nadal, E., Arino, J., Serrano, R., and Posas, F. (2001). Regulation of  
718 the Sko1 transcriptional repressor by the Hog1 MAP kinase in response to osmotic stress. *EMBO J*  
719 *20*, 1123-1133.
- 720 Purvis, J.E., and Lahav, G. (2013). Encoding and decoding cellular information through signaling  
721 dynamics. *Cell* *152*, 945-956.
- 722 Ramachandran, V., Shah, K.H., and Herman, P.K. (2011). The cAMP-dependent protein kinase  
723 signaling pathway is a key regulator of P body foci formation. *Mol Cell* *43*, 973-981.
- 724 Reinders, A., Burckert, N., Hohmann, S., Thevelein, J.M., Boller, T., Wiemken, A., and De Virgilio,  
725 C. (1997). Structural analysis of the subunits of the trehalose-6-phosphate synthase/phosphatase  
726 complex in *Saccharomyces cerevisiae* and their function during heat shock. *Mol Microbiol* *24*, 687-  
727 695.
- 728 Roosen, J., Engelen, K., Marchal, K., Mathys, J., Griffioen, G., Camerini, E., Thevelein, J.M., De  
729 Virgilio, C., De Moor, B., and Winderickx, J. (2005). PKA and Sch9 control a molecular switch  
730 important for the proper adaptation to nutrient availability. *Mol Microbiol* *55*, 862-880.
- 731 Savvides, A., Ali, S., Tester, M., and Fotopoulos, V. (2016). Chemical Priming of Plants Against  
732 Multiple Abiotic Stresses: Mission Possible? *Trends Plant Sci* *21*, 329-340.
- 733 Schenk, P.M., Kazan, K., Wilson, I., Anderson, J.P., Richmond, T., Somerville, S.C., and Manners,  
734 J.M. (2000). Coordinated plant defense responses in *Arabidopsis* revealed by microarray analysis. *Proc*  
735 *Natl Acad Sci U S A* *97*, 11655-11660.

736 Schepers, W., Van Zeebroeck, G., Pinkse, M., Verhaert, P., and Thevelein, J.M. (2012). In vivo  
737 phosphorylation of Ser21 and Ser83 during nutrient-induced activation of the yeast protein kinase A  
738 (PKA) target trehalase. *J Biol Chem* 287, 44130-44142.

739 Scholz, H., Franz, M., and Heberlein, U. (2005). The hangover gene defines a stress pathway required  
740 for ethanol tolerance development. *Nature* 436, 845-847.

741 Skalhegg, B.S., and Tasken, K. (2000). Specificity in the cAMP/PKA signaling pathway. Differential  
742 expression, regulation, and subcellular localization of subunits of PKA. *Front Biosci* 5, D678-693.

743 Smith, A., Ward, M.P., and Garrett, S. (1998). Yeast PKA represses Msn2p/Msn4p-dependent gene  
744 expression to regulate growth, stress response and glycogen accumulation. *EMBO J* 17, 3556-3564.

745 Souza, A.C., De Mesquita, J.F., Panek, A.D., Silva, J.T., and Paschoalin, V.M. (2002). Evidence for a  
746 modulation of neutral trehalase activity by Ca<sup>2+</sup> and cAMP signaling pathways in *Saccharomyces*  
747 *cerevisiae*. *Brazilian journal of medical and biological research = Revista brasileira de pesquisas*  
748 *medicas e biologicas* 35, 11-16.

749 Standart, N., and Weil, D. (2018). P-Bodies: Cytosolic Droplets for Coordinated mRNA Storage.  
750 *Trends Genet* 34, 612-626.

751 Trevisol, E.T., Panek, A.D., De Mesquita, J.F., and Eleutherio, E.C. (2014). Regulation of the yeast  
752 trehalose-synthase complex by cyclic AMP-dependent phosphorylation. *Biochim Biophys Acta* 1840,  
753 1646-1650.

754 Wang, C., Schmich, F., Srivatsa, S., Weidner, J., Beerenwinkel, N., and Spang, A. (2018). Context-  
755 dependent deposition and regulation of mRNAs in P-bodies. *Elife* 7.

756 Wang, L., Walker, B.L., Iannaccone, S., Bhatt, D., Kennedy, P.J., and Tse, W.T. (2009). Bistable  
757 switches control memory and plasticity in cellular differentiation. *Proc Natl Acad Sci U S A* 106,  
758 6638-6643.

759 Xiong, W., and Ferrell, J.E., Jr. (2003). A positive-feedback-based bistable 'memory module' that  
760 governs a cell fate decision. *Nature* 426, 460-465.

761 Zid, B.M., and O'Shea, E.K. (2014). Promoter sequences direct cytoplasmic localization and  
762 translation of mRNAs during starvation in yeast. *Nature* 514, 117-121.

763  
764  
765

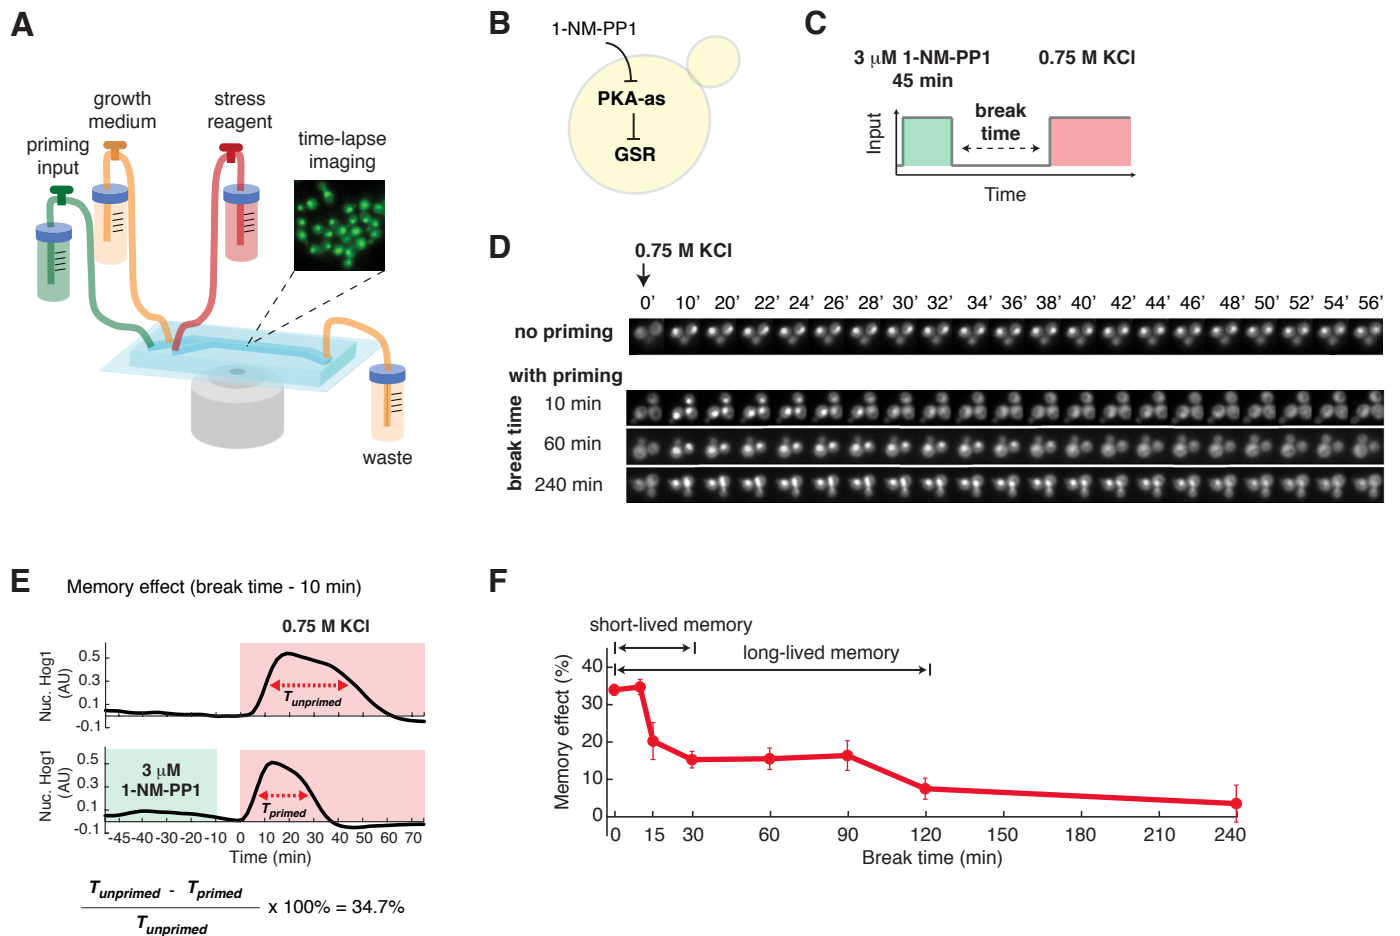

**Figure 1. PKA encodes biphasic cellular memory.** (A) A diagram of the microfluidic system used in priming experiments. The microfluidic device contains three inlets for priming input, growth medium, and stress reagent, respectively. Yeast cells were immobilized in the culturing chamber for time-lapse microscopic imaging. The medium flow from the inlets to the waste is driven by gravity. The three inlets can be opened/closed to allow medium switching during the experiment. (B) A diagram describes the analog sensitive PKA strain used in this study. (C) A schematic of the experimental design. Within the microfluidic device, cells were first exposed to a pulse of 1-NM-PP1 priming input, followed by a break time of normal growth medium. These primed cells were then exposed to sustained 0.75 M KCl treatment. (D) Representative time-lapse images of Hog1 nuclear translocation in the priming experiments with different break times. Left panel - schematic illustration of the priming experiments. (E) Time traces of Hog1 translocation in response to 0.75 M KCl (red shaded) without (top) or with (bottom) 45 min priming with 3  $\mu$ M 1-NM-PP1 (green shaded) followed by 10 min break time. The duration of nuclear localization was quantified using the full width at half maximum (FWHM) in single cells ( $T_{primed}$  and  $T_{unprimed}$ ). The memory effect has been calculated using  $T_{primed}$  and  $T_{unprimed}$ . (F) Biphasic memory dynamics in response to the high-amplitude prolonged priming input (panel C). The plot shows the relationship of memory effect versus break time. Data points are averages of at least three independent experiments. Error bars – standard error of the mean (SEM). The Hog1 time trace for each break time is shown in Figure S1.

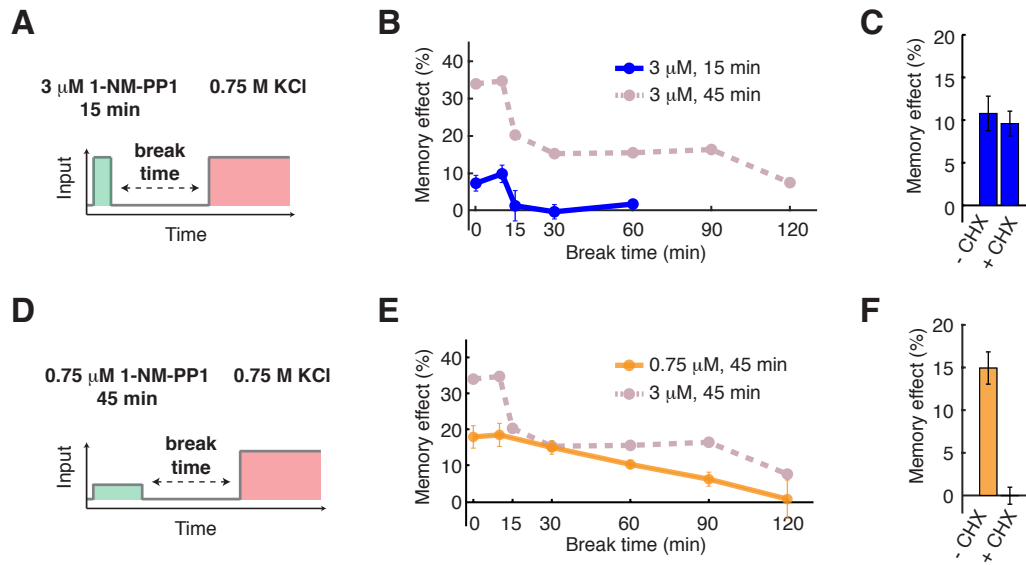

**Figure 2. Short- and long-lived memory can be selectively induced by different priming input dynamics.** (A) A schematic of the priming experiment with the high-amplitude transient priming input (15 min, 3  $\mu$ M 1-NM-PP1). (B) The dynamics of memory effect in response to the high-amplitude transient priming input. Dashed line in dark pink represents the memory dynamics from Fig. 1F and is included in the plot for comparison. (C) The dependence of short-lived memory effect on translation. The bar graph shows the memory effects in response to 15 min, 3  $\mu$ M 1-NM-PP1 priming input with a 10 min break time, with or without 10  $\mu$ g/mL cycloheximide treatment (CHX). (D) A schematic of the priming experiment with the low-amplitude prolonged priming input (45 min, 0.75  $\mu$ M 1-NM-PP1). (E) The dynamics of memory effect in response to the low-amplitude prolonged priming input. Dashed line in dark pink represents the memory dynamics from Fig. 1F and is included in the plot for comparison. (F) The dependence of long-lived memory effect on translation. The bar graph shows the memory effects in response to 45 min, 0.75  $\mu$ M 1-NM-PP1 priming input with a 30 min break time, with or without the CHX treatment. Data points are averages of at least three independent experiments. Error bars – SEM.



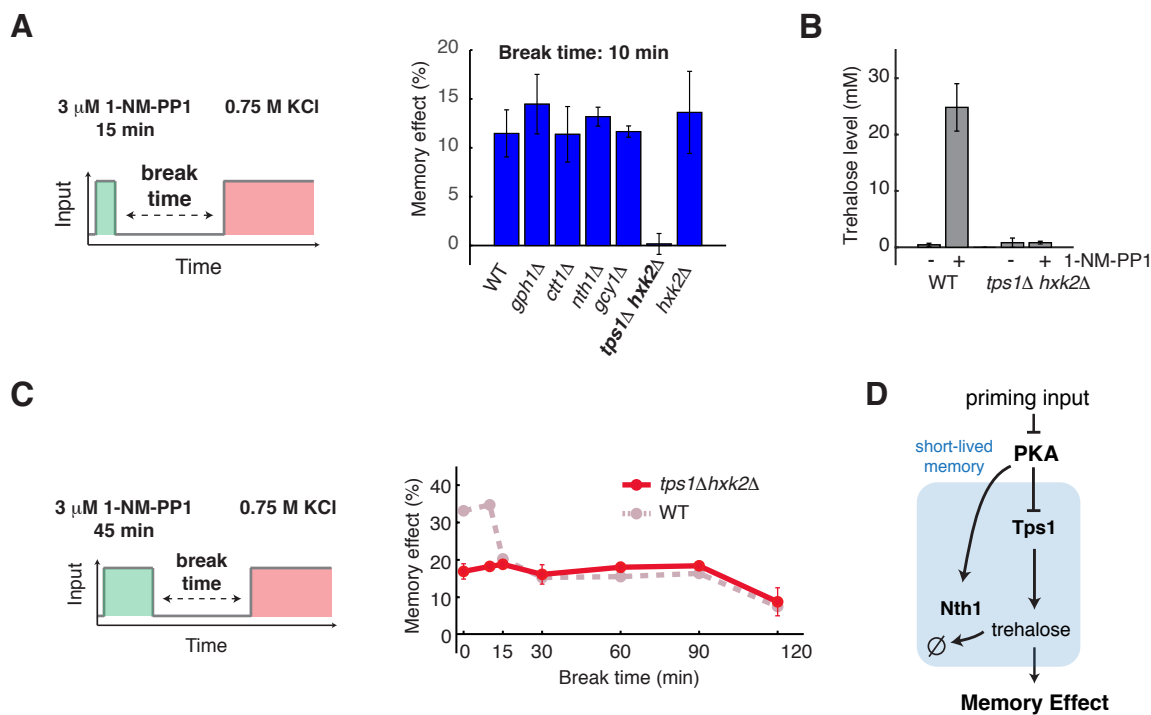

**Figure 3. Short-lived memory is mediated by trehalose synthesis and metabolism.** (A) Identification of Tps1 in mediating short-term memory. The bar graph shows the memory effects in response to the high-amplitude transient priming input (15 min, 3  $\mu$ M 1-NM-PP1) with a 10 min break time in WT and mutant strains. (B) Intracellular trehalose level increases in response to PKA inhibition. Bar graph shows trehalose levels in WT and *tps1 $\Delta$  hxxk2 $\Delta$* , with and without PKA inhibition. Trehalose levels were measured after a 20-min treatment of 3  $\mu$ M 1-NM-PP1. (C) Memory dynamics in *tps1 $\Delta$  hxxk2 $\Delta$*  in response to the high-amplitude prolonged priming input (45 min, 3  $\mu$ M 1-NM-PP1). Left panel, the schematic illustrating the treatment procedure of the priming experiment. Right panel, memory dynamics in *tps1 $\Delta$  hxxk2 $\Delta$* . Dashed lines in dark pink represent the memory dynamics in WT (from Fig. 1F) and are included in the plots for comparison. Data points are averages of at least three independent experiments. Error bars – SEM. (D) A diagram illustrates the network motif that gives rise to short-lived memory.

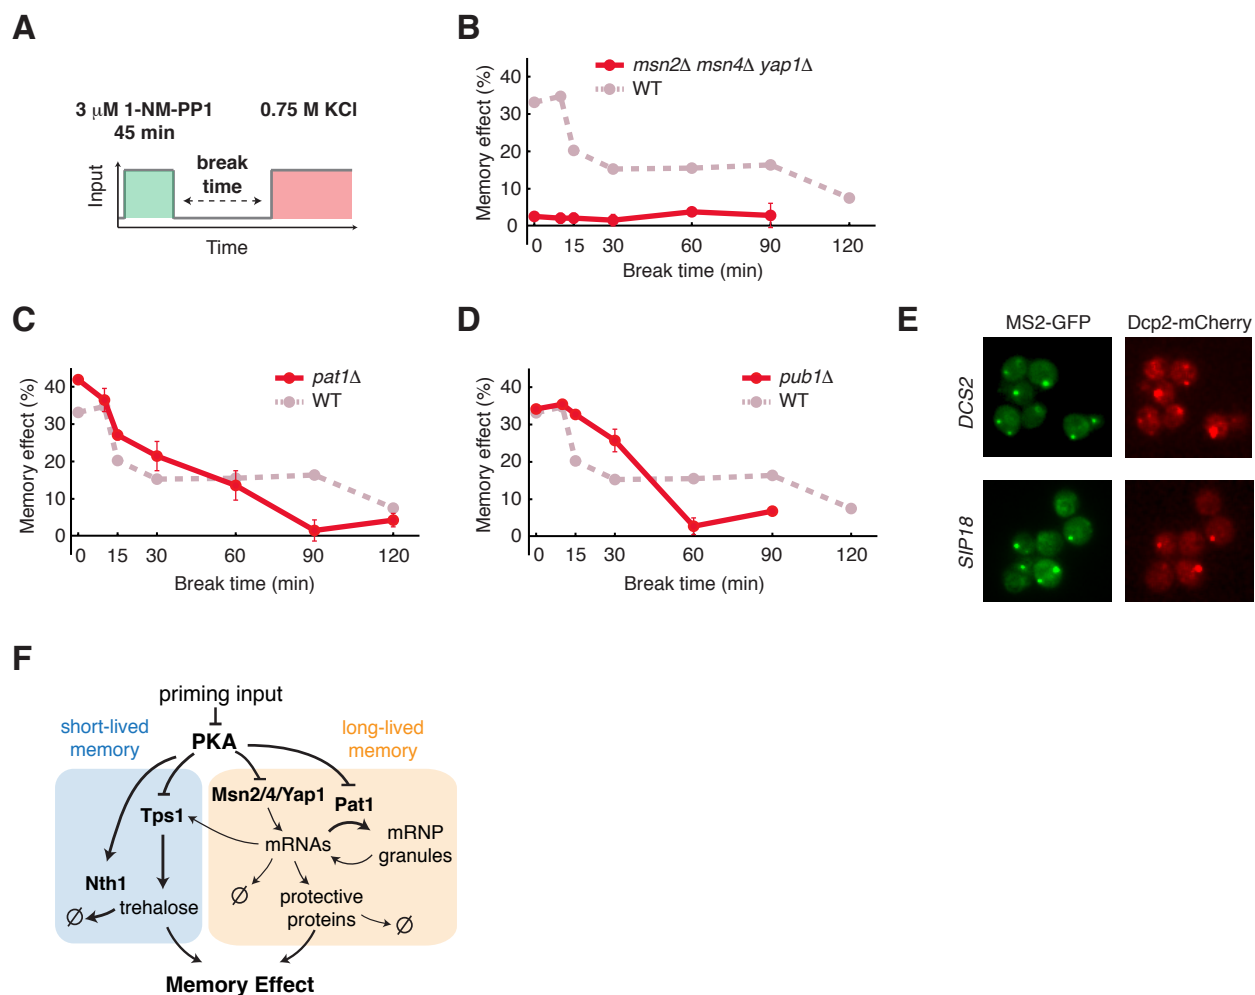

**Figure 4. Long-lived memory is mediated by stress-activated TFs and mRNP granules.** (A) A schematic of the priming experiment with the high-amplitude prolonged priming input (45 min, 3  $\mu$ M 1-NM-PP1). Memory dynamics in (B) *msn2Δ msn4Δ yap1Δ*, (C) *pat1Δ*, and (D) *pub1Δ* in response to the high-amplitude prolonged priming input. Data points are averages of at least three independent experiments. Error bars – SEM. Dashed line in dark pink represents the memory dynamics in WT (from Fig. 1F) and is included in the plot for comparison. (E) Co-localization of *DCS2* or *SIP18* mRNAs with PBs (Dcp2-mCherry) in response to 3  $\mu$ M 1-NM-PP1. Foci formation was observed within 20 min of the input treatment. Representative images were acquired at 170 min. (F) A diagram illustrates the PKA-regulated network that mediates short-lived and long-lived memory.

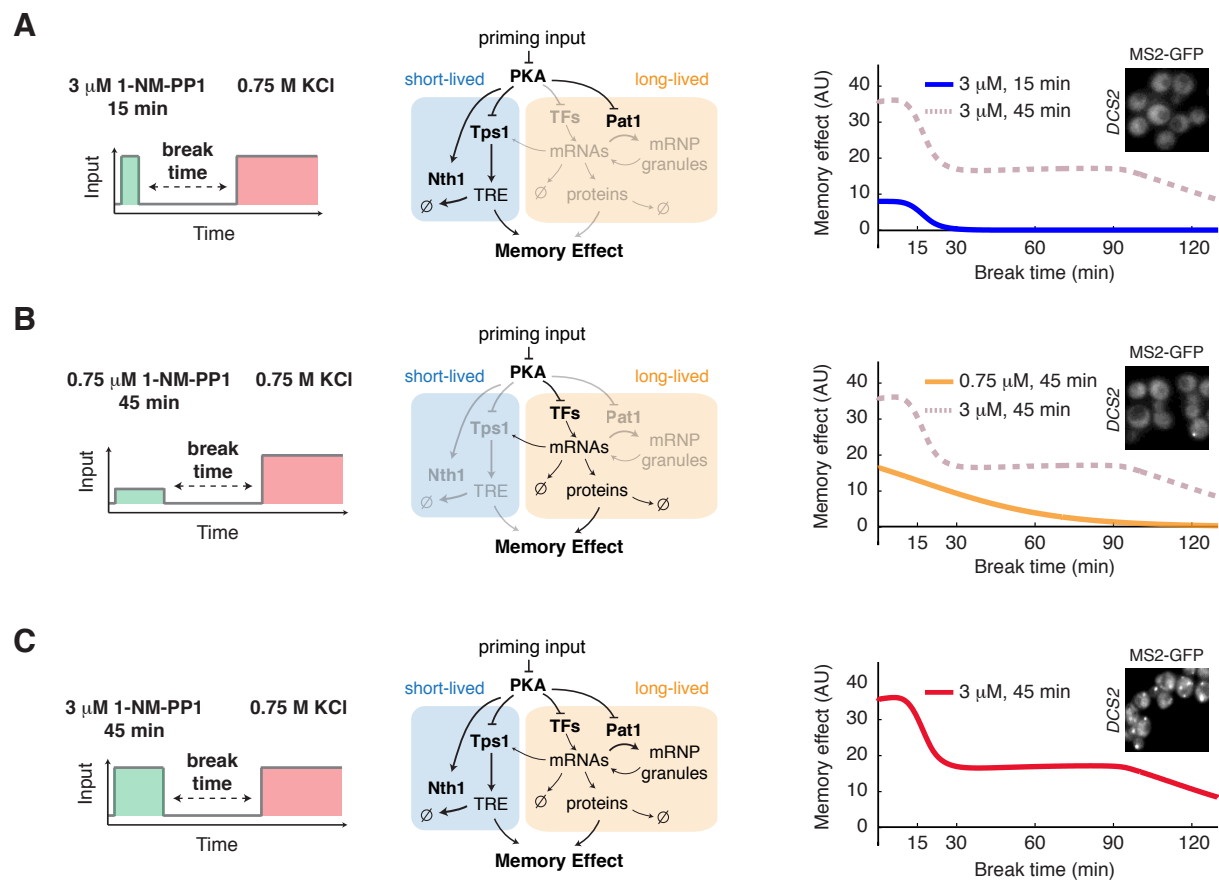

**Figure 5. Computational modeling reveals the network-mediated encoding of cellular memory.** (A) Model simulation of memory dynamics in response to the high-amplitude transient priming input (15 min,  $3 \mu\text{M}$  1-NM-PP1). Left panel, the schematic illustrates the treatment procedure. Middle panel, the diagram highlights the part of the network that is activated by the input (black – activated; light gray – not activated). Right panel, the plot shows the simulated dynamics of memory effect. Dashed line in dark pink represents the simulated dynamics in response to the high-amplitude prolonged priming input (45 min,  $3 \mu\text{M}$  1-NM-PP1) and is included in the plot for comparison. (B) Model simulation of memory dynamics in response to the low-amplitude prolonged priming input (45 min,  $0.75 \mu\text{M}$  1-NM-PP1). (C) Model simulation of memory dynamics in response to the high-amplitude prolonged priming input (45 min,  $3 \mu\text{M}$  1-NM-PP1). Insets, the granule formation of DCS2 mRNA in response to indicated inputs. Representative images were acquired at the end of input treatments.

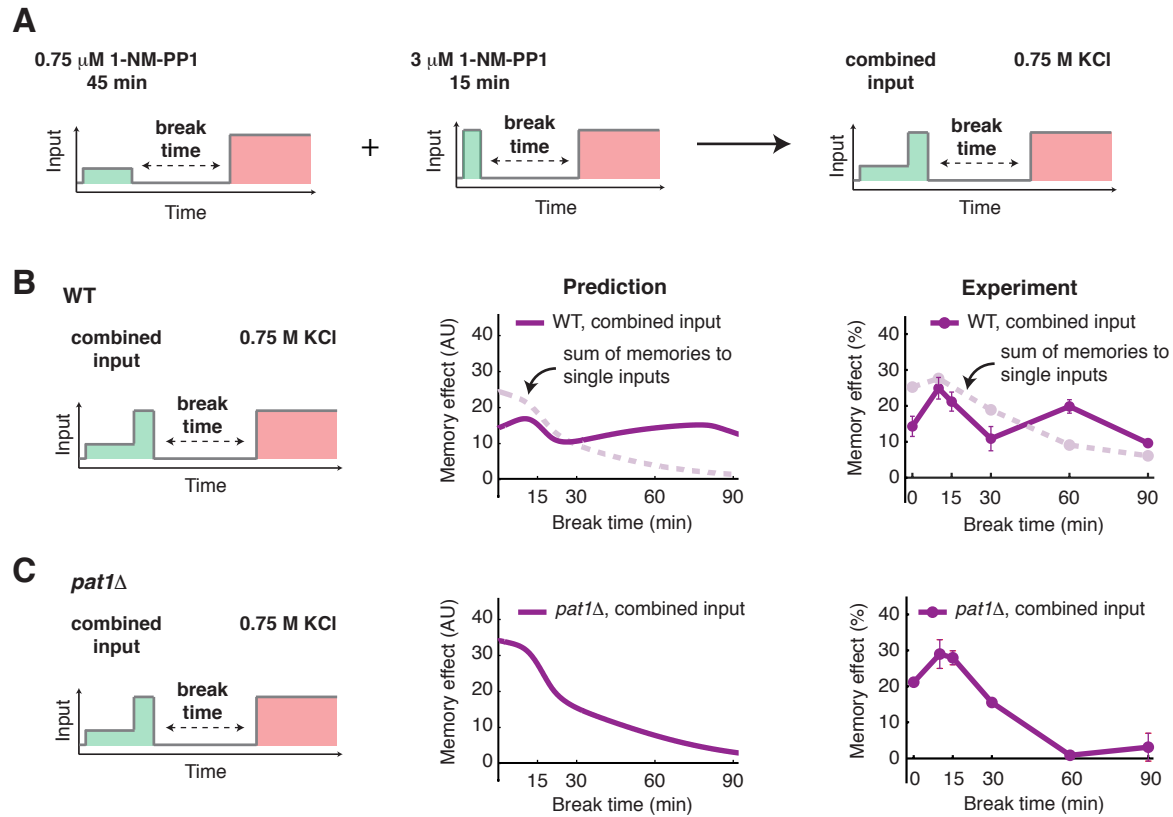

**Figure 6. Model prediction and experimental validation.** (A) A diagram illustrates the temporally combined input. Two single inputs (45 min, 0.75  $\mu$ M 1-NM-PP1 and 15 min, 3  $\mu$ M 1-NM-PP1) were applied sequentially to produce the combined input (45 min, 0.75  $\mu$ M 1-NM-PP1 followed by 15 min, 3  $\mu$ M 1-NM-PP1). (B) Model prediction and experimental validation of memory dynamics in WT in response to the combined input. Left panel, the schematic illustrates the treatment procedure. Middle panel, the plot shows the predicted memory dynamics in response to the combined input. Dashed line in light pink represents the sum of memories to two single inputs from Fig. 5A and 5B and is included in the plot for comparison. Right panel, the plot shows the experimentally measured memory dynamics in WT in response to the combined input. Dashed line in light pink represents the sum of memories to two single inputs from Fig. 2B and 2E and is included in the plot for comparison. (C) Model prediction and experimental validation of memory dynamics in *pat1* $\Delta$  in response to the combined input.
